# Supplementary material for: HoxC5 and miR-615-3p target newly evolved genomic regions to repress hTERT and inhibit tumorigenesis
Source: Nat Commun. 2018 Jan 8;9:100. doi: 10.1038/s41467-017-02601-1 (PMC5758779; doi:10.1038/s41467-017-02601-1)
Supplement: Supplementary file 1 — supplementary info [file 41467_2017_2601_MOESM1_ESM.pdf]

**Supplementary Figures**

a

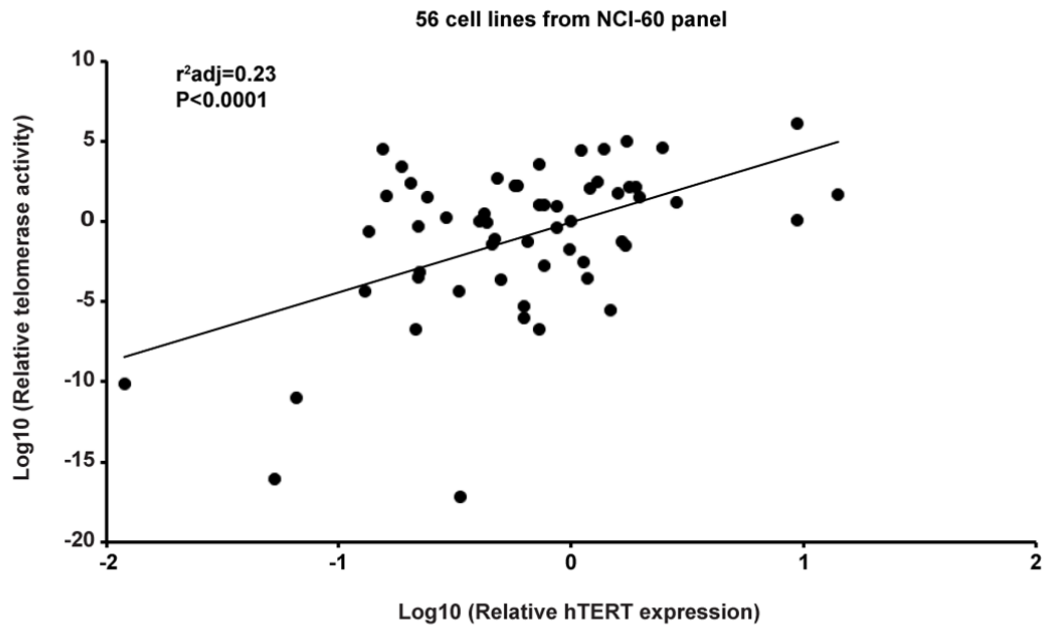

b

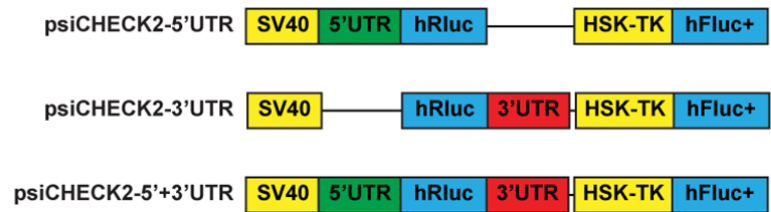

**Supplementary Figure 1: The expression level of *hTERT* mRNA correlates with telomerase activity in cancer cells.**

a. Scatter plot for relative telomerase activity and *hTERT* mRNA expression in 56 human cancer cell lines in NCI-60 panel.

b. Schematic representation of the psiCHECK2-3'UTR, psiCHECK2-5'UTR and psiCHECK2-5'+3'UTR reporter constructs.

16

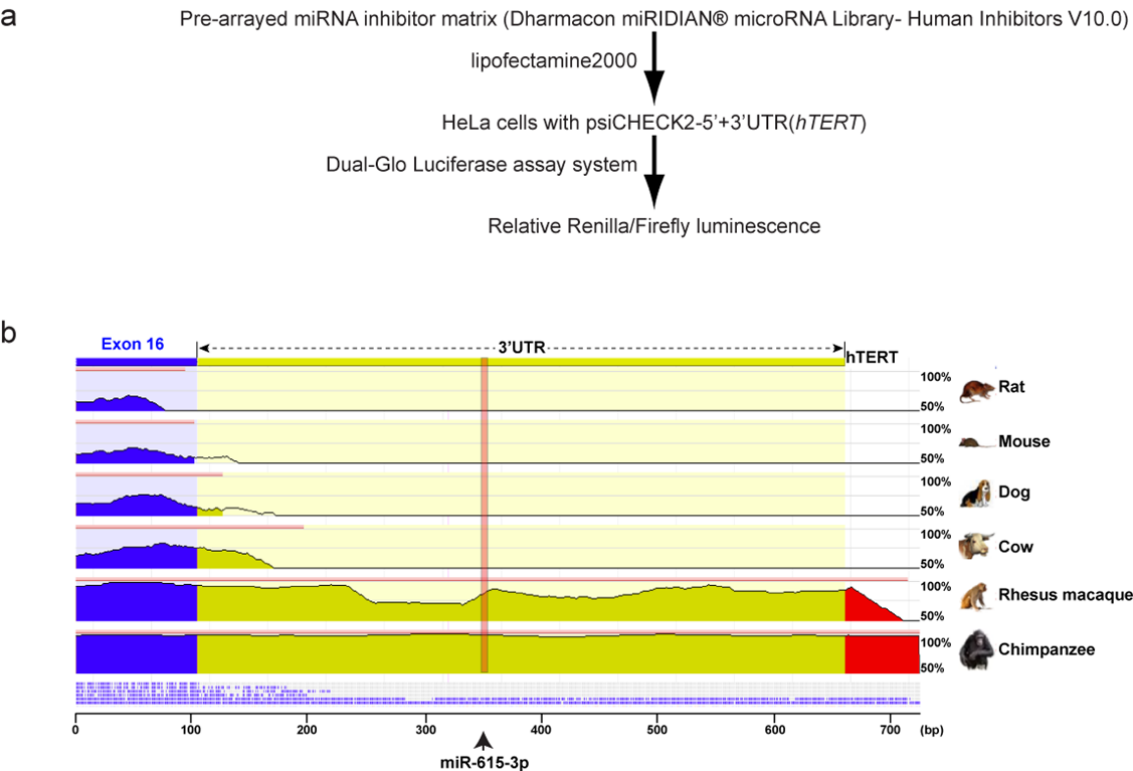

17

18

**Supplementary Figure 2: Genome-wide miRNA inhibitor screen identify miR-615-3p targeting *hTERT* 3'UTR.**

a. Design of the genome-wide miRNA inhibitor library screen to identify miRNAs that target *hTERT* UTRs.

b. The 3'UTR sequences of the *TERT* mRNA from rat, mouse, dog, cow, rhesus macaque, chimpanzee and human were compared using the ECR-Browser software (<http://ecrbrowser.dcode.org>). The height of the curves (50% < X < 100%) indicates the homology (blue = exon, yellow = untranslated regions of the RNA, red = intergenic regions, pink line above indicate evolutionary conserved region). The miR-615-3p target site is indicated by arrowhead and highlighted in pink.

29

30

31

32

33

34

35

36

37

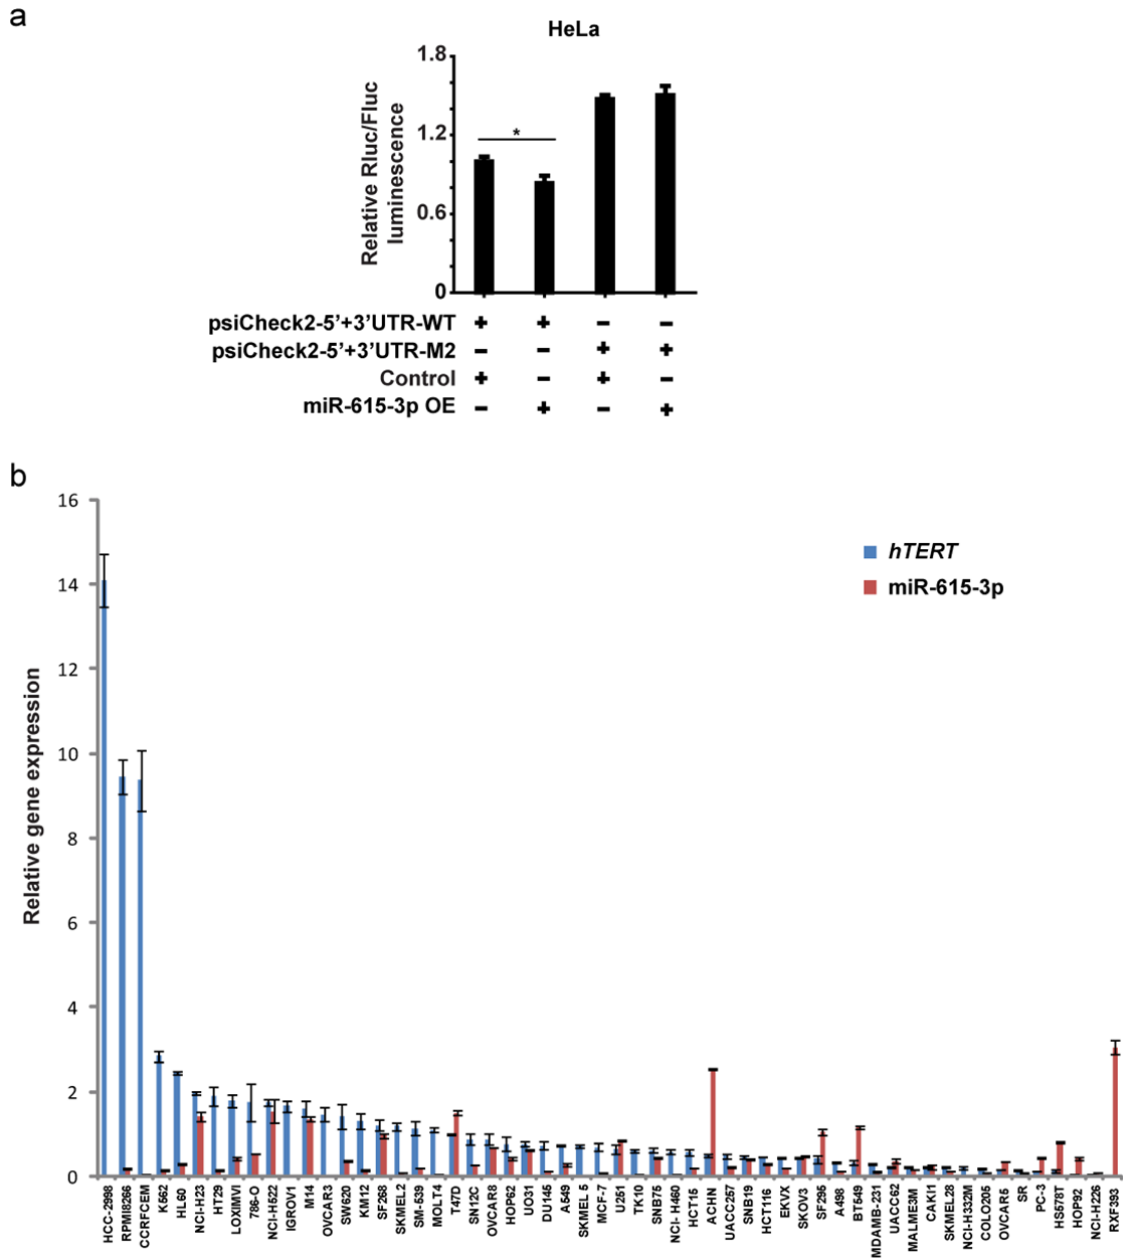

**Supplementary Figure 3: Regulation of *hTERT* expression by miR-615-3p.**

a. miR-615-3p targets *hTERT* 3'UTR to suppress *hTERT* expression. Significance was determined by t-test. \*  $P \leq 0.05$ .

b. The relative expression of *hTERT* mRNA and miR-615-3p in 56 human cancer cell lines in NCI-60 panel as quantified by real-time RT-PCR. The expression of *hTERT* mRNA and miR-615-3p in 293T cells was set as 1.

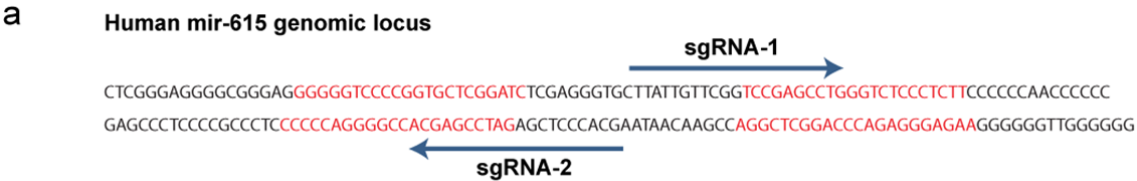

**Scored by inverse likelihood of off target binding**

| Score       | Sequence                  |
|-------------|---------------------------|
| Guide #1 96 | CTTATTGTTTCGGTCCGAGCC TGG |
| Guide #2 92 | CACCCTCGAGATCCGAGCAC CGG  |

**b**      **RKO *mir-615* knockout clone 1 (-15bp,-15bp)**

|                                                                   |              |
|-------------------------------------------------------------------|--------------|
| CTCGGAGGGGCGGGAGGGGGTCCCGGTCTCGGATCTCGAGGGTGCTTATTGTTTCGGTCCGAGCC | CCCCCAACCCCC |
| GAGCCCTCCCGCCCTCCCCAGGGGCCACGAGCCTAGAGCTCCACGAATAACAAGCCAGGCTCGG  | GGGGTTGGGGG  |
| CTCGGAGGGGCGGGAGGGGGTCCCGGTCTCGGATCTCGAGGGTGCTTATTGTTTCGGTCCGAGCC | CCCCAACCCCC  |
| GAGCCCTCCCGCCCTCCCCAGGGGCCACGAGCCTAGAGCTCCACGAATAACAAGCCAGGCTCGG  | GGGGTTGGGGG  |

**RKO *mir-615* knockout clone 2 (-5bp,-5bp)**

|                     |                                                                     |
|---------------------|---------------------------------------------------------------------|
| CTCGGAGGGGCGGGAGGGG | CGGTGCTCGGATCTCGAGGGTGCTTATTGTTTCGGTCCGAGCCTGGGTCTCCTCTTCCCCAACCCCC |
| GAGCCCTCCCGCCCTCCCC | GCCACGAGCCTAGAGCTCCACGAATAACAAGCCAGGCTCGGACCCAGAGGAGAAAGGGGGTTGGGGG |
| CTCGGAGGGGCGGGAGGGG | CGGTGCTCGGATCTCGAGGGTGCTTATTGTTTCGGTCCGAGCCTGGGTCTCCTCTTCCCCAACCCCC |
| GAGCCCTCCCGCCCTCCCC | GCCACGAGCCTAGAGCTCCACGAATAACAAGCCAGGCTCGGACCCAGAGGAGAAAGGGGGTTGGGGG |

**Supplementary Figure 4: CRISPR/Cas9-mediate knockout of *mir-615-3p* in RKO cells.**

- a. Schematic design of CRISPR sgRNAs for knockout of *mir-615-3p*.
- b. Sanger sequencing confirmed the small deletions in *mir-615* hairpin region, which is crucial for the maturation of miR-615-3p in two independent clonal derived RKO cell lines.

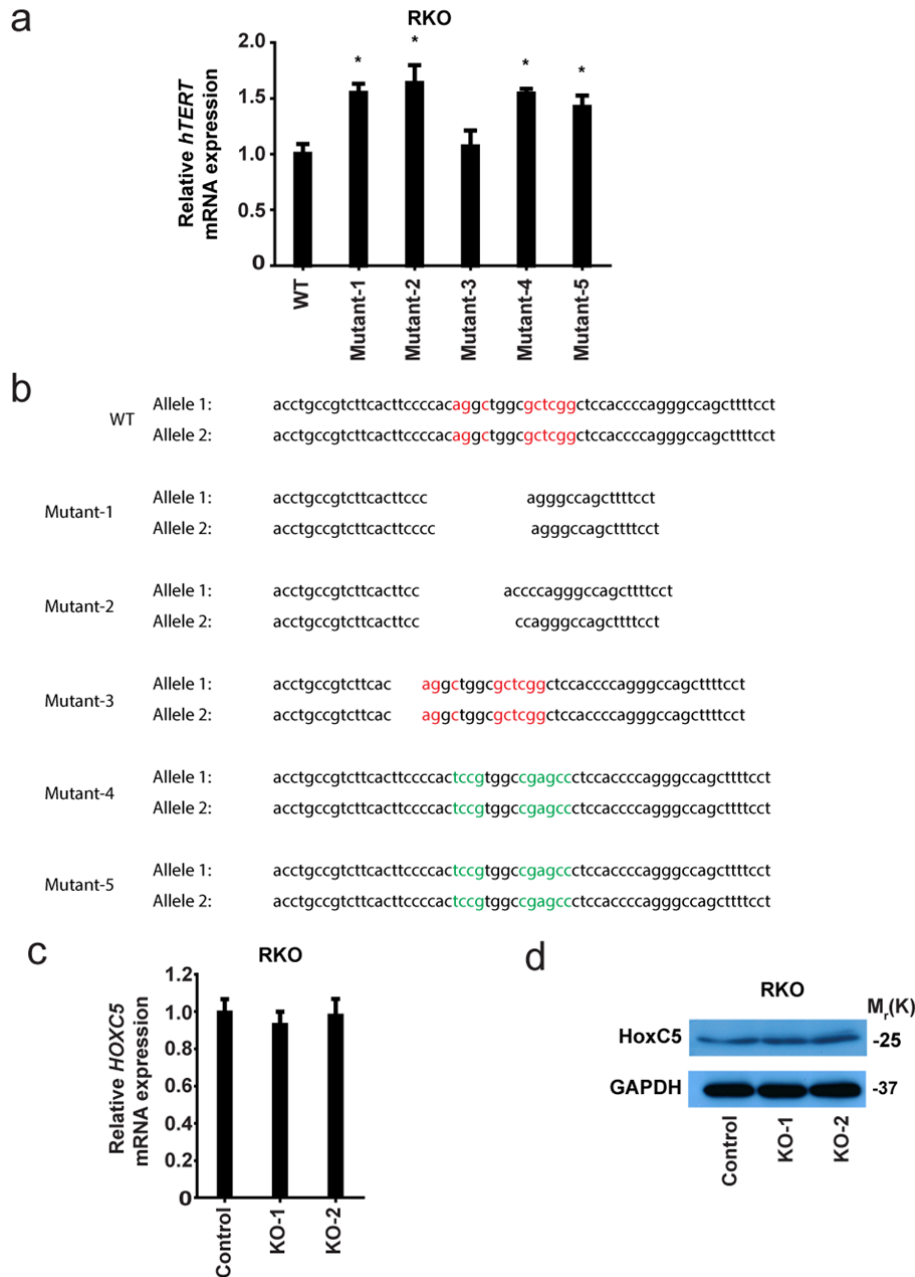

**Supplementary Figure 5: Mutation of miR-615-3p binding site in the endogenous *hTERT* 3'UTR resulted in increased *hTERT* mRNA expression.**

a. Relative *hTERT* mRNA expression in parental RKO cells or clonal derived RKO cell lines with small deletions or mutations in the *hTERT* 3'UTR. Significance was determined by t-test.

\*  $P \leq 0.05$ .

b. Sanger sequencing confirmed the small deletions and mutations in *hTERT* 3'UTR region. The seed region and the additional conserved site are highlighted in red. The mutated bases are highlighted in green.

c. Real-time RT-PCR showing the expression of endogenous *HOXC5* mRNA in parental and *mir-615-3p* knockout RKO cell lines.

d. Western blotting showing the expression of endogenous HoxC5 in parental and *mir-615-3p* knockout RKO cell lines.

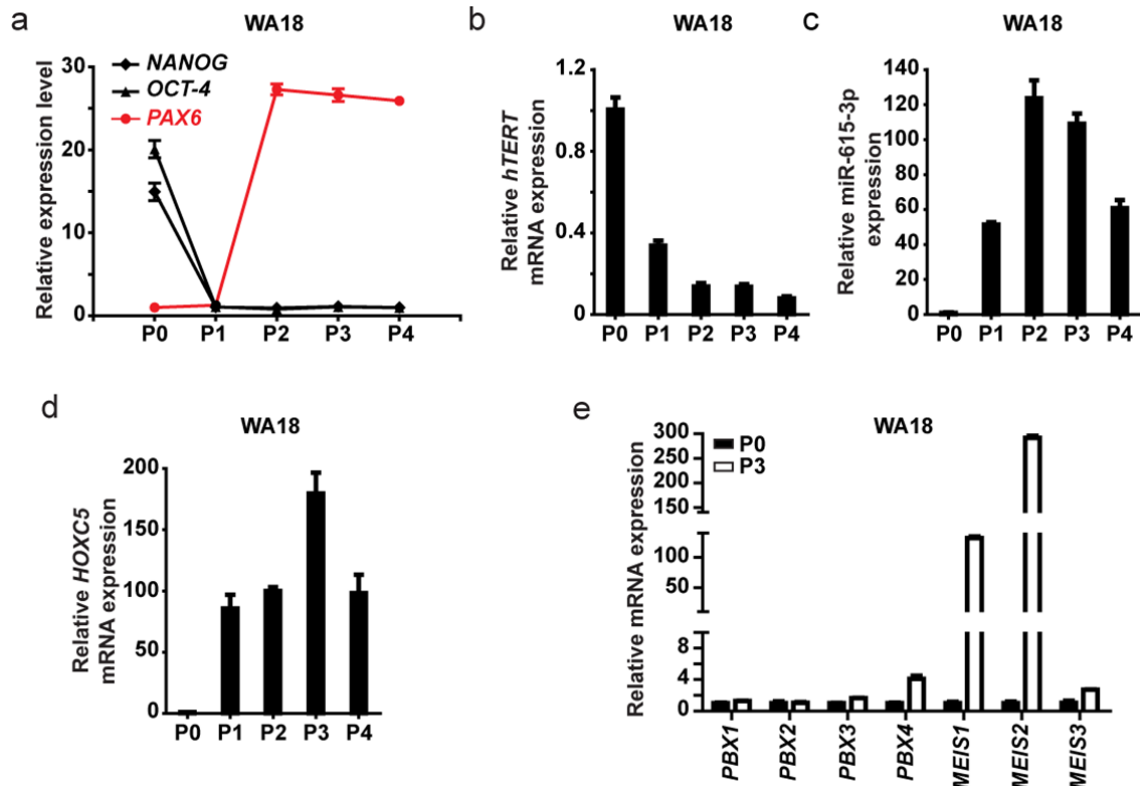

**Supplementary Figure 6: Expression of *hTERT*, miR-615-3p, *HOXC5*, *PBX1-4*, and *MEIS1-3* in WA18 human ES cells upon neural induction.**

a. The expression of pluripotency genes (*NANOG* and *OCT-4*) and neurodevelopmental gene *PAX6* during neural differentiation (passage 0 to 4) in WA18 ES cells were quantified by real-time RT-PCR.

b. c. and d. The expression of *hTERT* mRNA, miR-615-3p and *HOXC5* mRNA during neural differentiation (passage 0 to 4) in WA18 cells was quantified by real-time RT-PCR as indicated.

e. The expression of *PBX1-4* and *MEIS1-3* in P0 and P3 of WA18 neural differentiation was quantified by real-time RT-PCR as indicated.

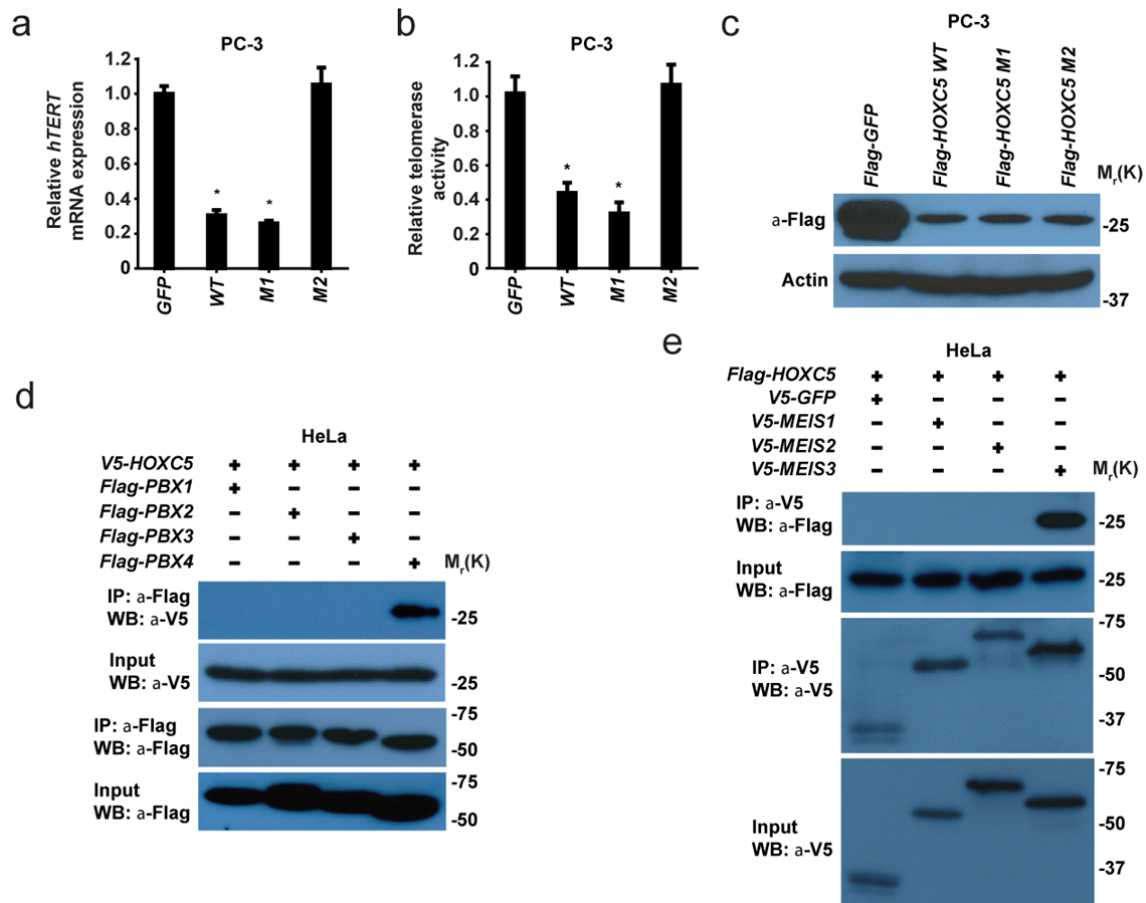

**Supplementary Figure 7: HoxC5 recruits Pbx4 and Meis3 to suppress *hTERT* expression.**

a. Relative *hTERT* mRNA expression in PC-3 cells transduced with lentivirus overexpressing Flag-tagged GFP, wild-type (WT), or mutant (M1 or M2) *HOXC5*. Significance was determined by t-test. \*  $P \leq 0.05$ .

b. Relative telomerase activity in PC-3 cells transduced with lentivirus overexpressing Flag-tagged GFP, wild-type (WT), or mutant (M1 or M2) *HOXC5*. Significance was determined by t-test. \*  $P \leq 0.05$ .

c. Western blotting shows the expression of Flag-tagged GFP, wild-type (WT) and mutant (M1 or M2) HoxC5 expressed in PC-3 cells.

d. Immunoprecipitation of Flag-tagged Pbx4, but not Flag-tagged Pbx1, 2 or 3 resulted in specific co-immunoprecipitation of V5-tagged HoxC5 in HeLa cells.

e. Immunoprecipitation of V5-tagged Meis3, but not V5-tagged Meis1 or 2 resulted in specific co-immunoprecipitation of Flag-tagged HoxC5 in HeLa cells.

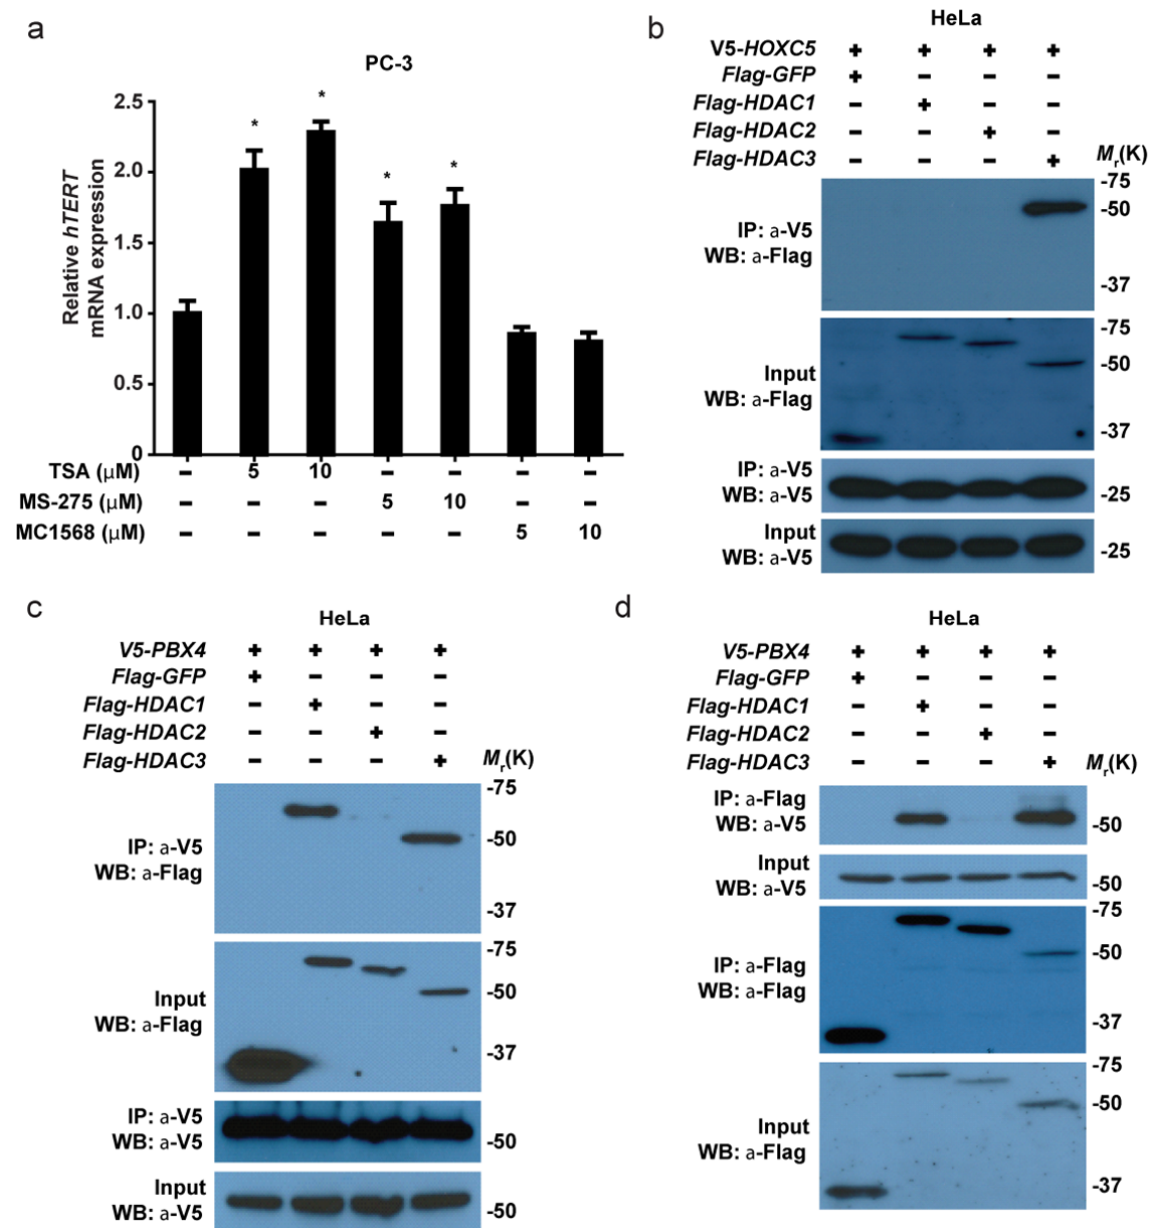

**Supplementary Figure 8: HDAC1 and 3 containing co-repressor complex is necessary for HoxC5-Pbx4 mediated suppression of *hTERT* expression.**

a. The expression of *hTERT* mRNA in PC-3 cells treated with HDAC inhibitors TSA, MS-275 or MC1568 as quantified by real-time RT-PCR. Significance was determined by t-test. \*  $P \leq 0.05$ .

b. Immunoprecipitation of V5-tagged HoxC5 resulted in co-immunoprecipitation of Flag-tagged HDAC3, but not Flag-tagged HDAC1 or 2 in HeLa cells.

c. Immunoprecipitation of V5-tagged Pbx4 resulted in specific co-immunoprecipitation of Flag-tagged HDAC1 and 3, but not HDAC2 in HeLa cells.

d. Immunoprecipitation of Flag-tagged HDAC1 and 3, but not HDAC2, resulted in efficient co-immunoprecipitation of V5-tagged Pbx4 in HeLa cells.

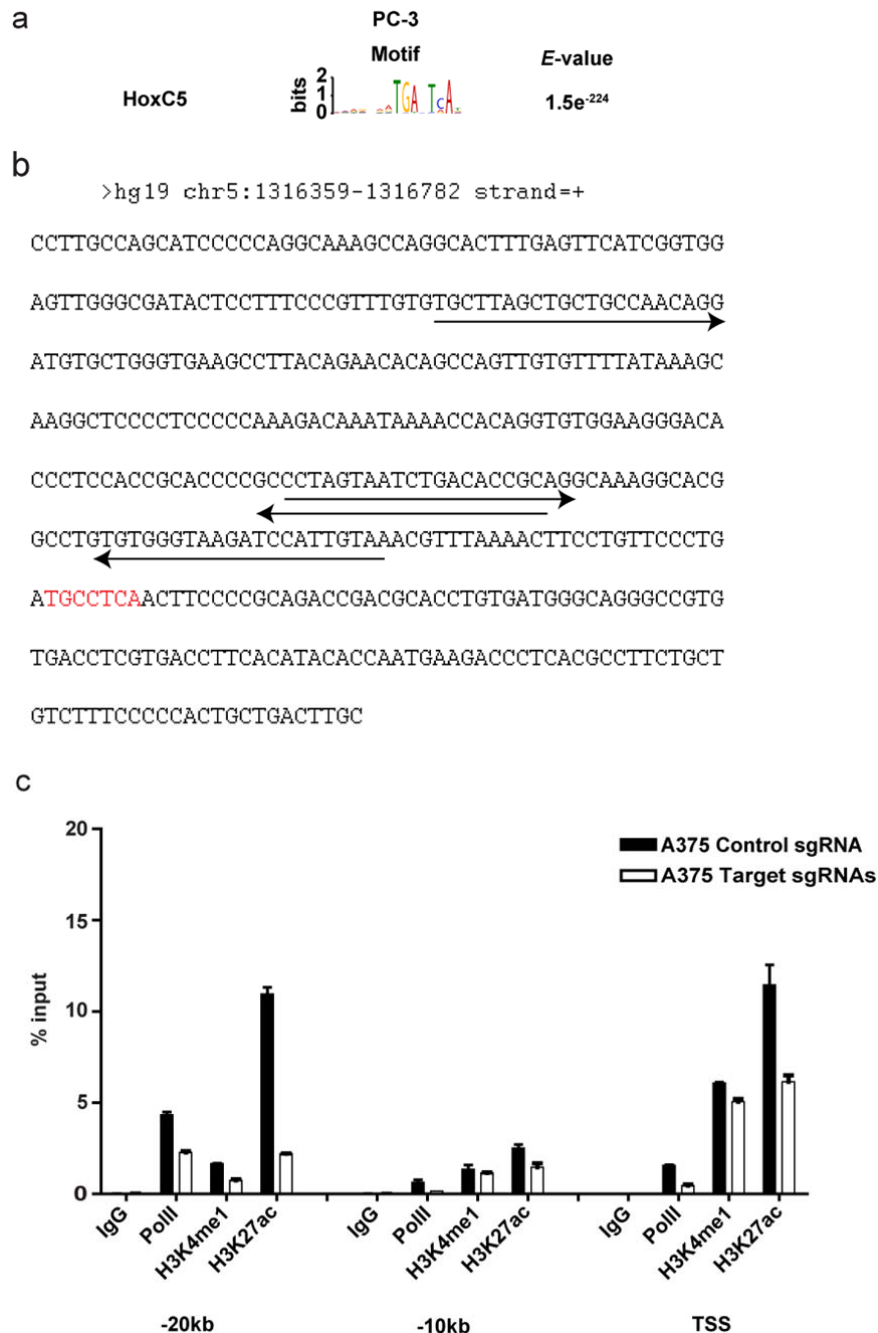

**Supplementary Figure 9: Identification of HoxC5 DNA binding motif in *hTERT* upstream enhancer region.**

a. The consensus DNA binding motif of HoxC5 was detected using MEME on the endogenous HoxC5 binding sites in PC-3 cells.

b. The putative binding motif in the *hTERT* -20 kb upstream HoxC5 binding region is highlighted in red. The four sgRNAs used in CRISPRi experiment are indicated by arrows.

c. ChIP was performed against RNA polymerase II (Pol2), H3K4me1, and H3K27ac in A375 cells co-expressing dCas9-KRAB with control sgRNA or sgRNAs targeting the HoxC5 binding region at upstream *hTERT* enhancer followed by qPCR with primers specific for *hTERT* TSS, -10kb and -20kb upstream regions as indicated.

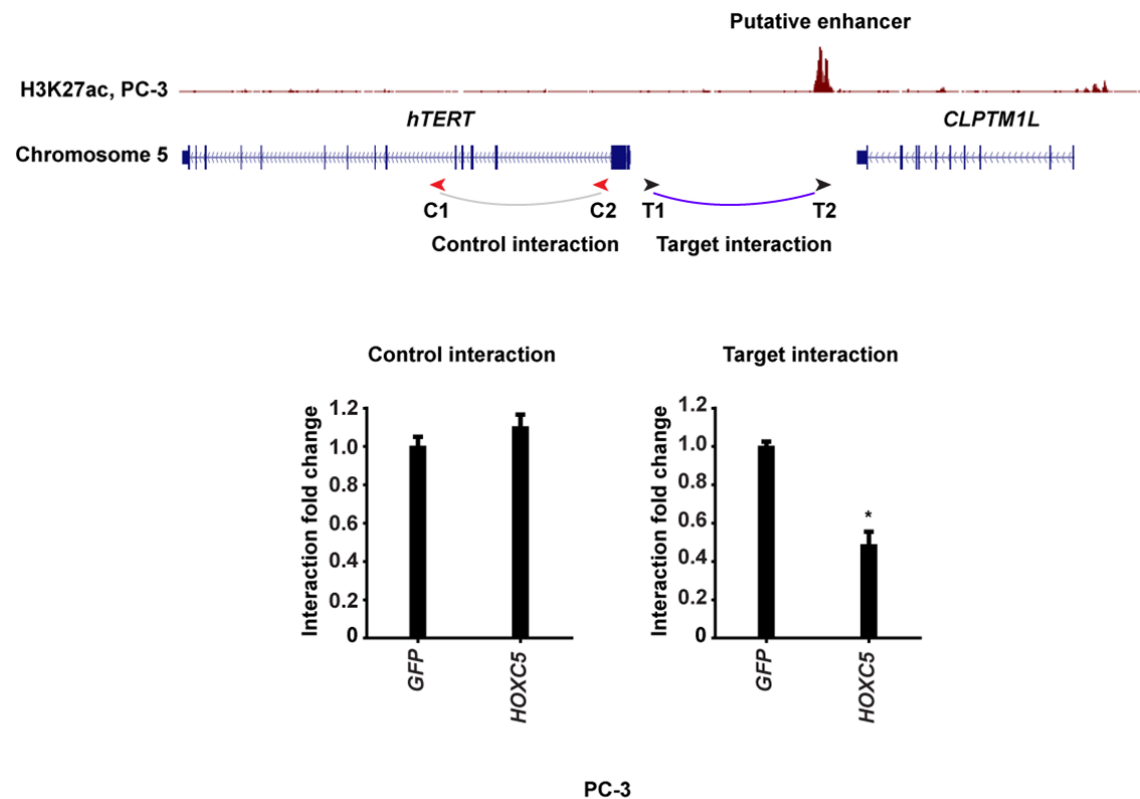

**Supplementary Figure 10: Overexpression of *HOXC5* in PC-3 cells disrupts the long-range interaction between *hTERT* promoter and distal enhancer.** Control interaction: Based on the 4C-seq data, we selected a region in the *hTERT* coding region with background levels of interaction, with a similar genomic distance from the *hTERT* bait region to serve as a control interaction. Target interaction: long-range interaction between *hTERT* promoter and putative enhancer. Significance was determined by t-test. \*  $P \leq 0.05$ .

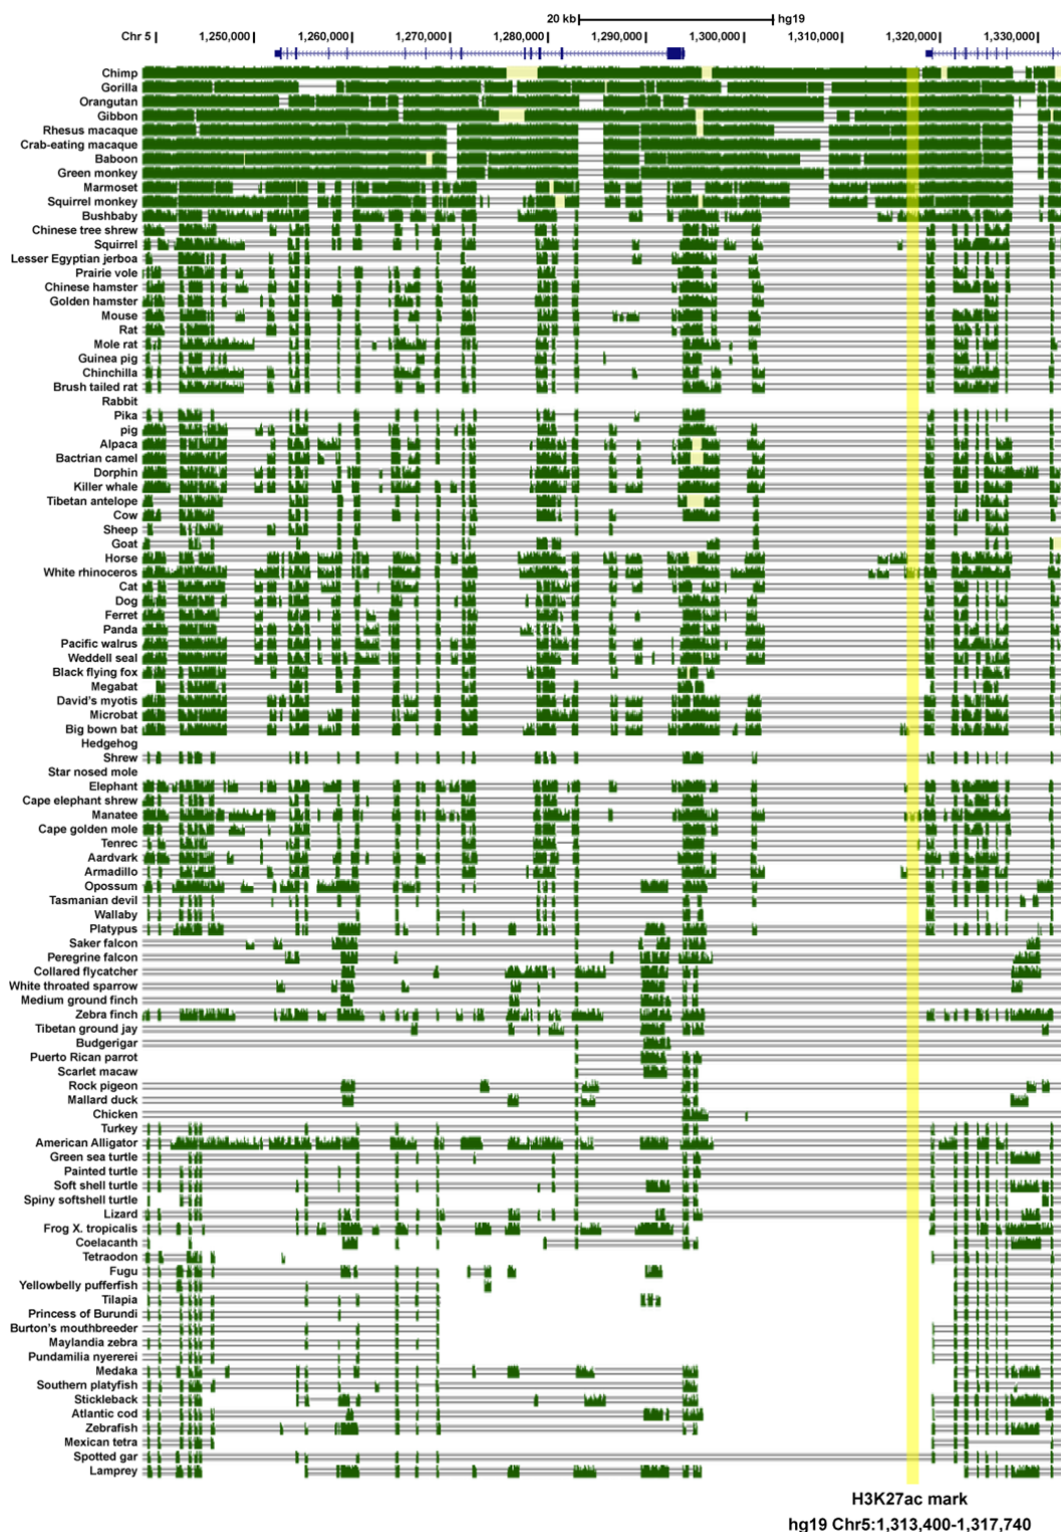

**Supplementary Figure 11: The conservation of *hTERT* upstream enhancer region in 100 vertebrate species.** Pairwise alignments of each species to the human genome are displayed as histogram to indicate conservation score. The upstream enhancer region is highlighted in yellow.

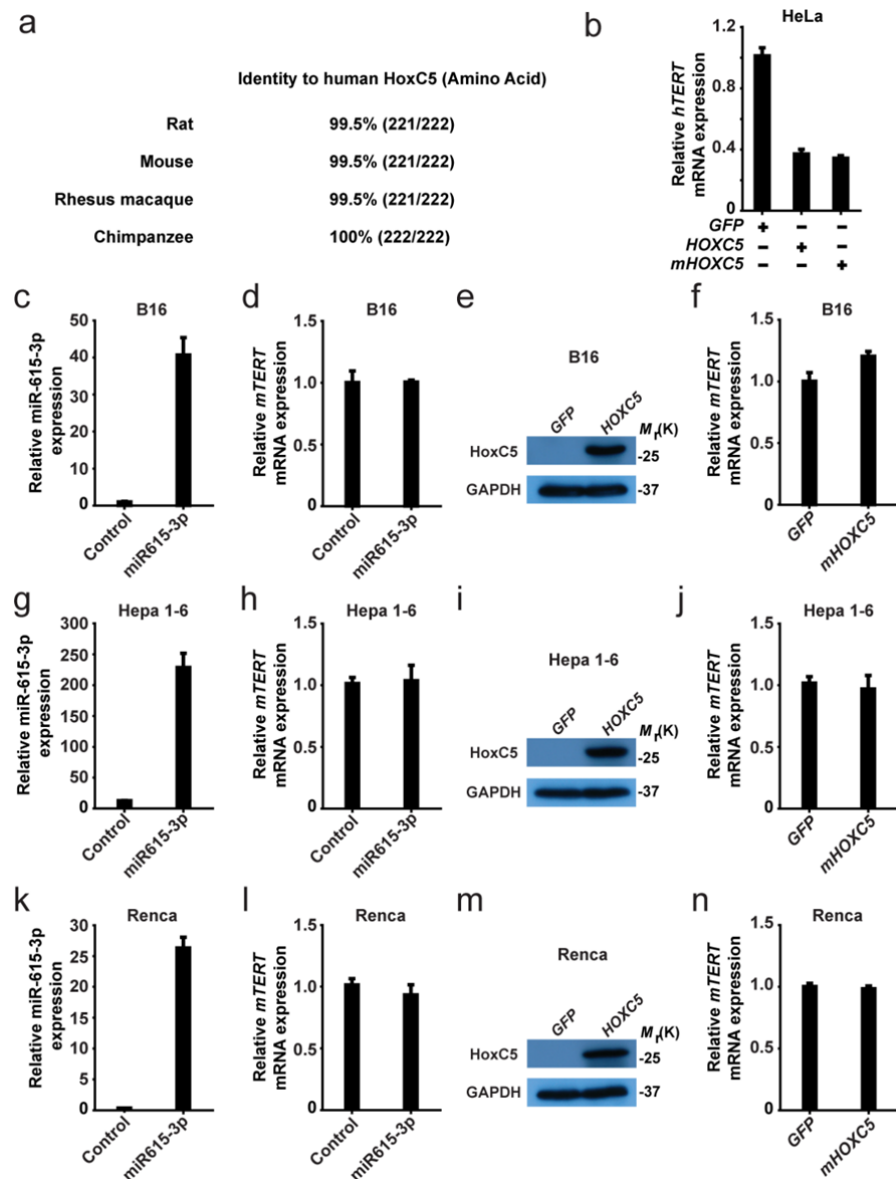

**Supplementary Figure 12: Distinct function of *HOXC5* in regulation of *TERT* expression in human and mouse cells.**

a. The identity of HoxC5 protein from different species in comparison to human HoxC5 protein was indicated.

b. Relative *hTERT* mRNA expression in HeLa transduced with lentivirus overexpressing Flag-tagged human or mouse *HOXC5*.

c. g. and k. Relative miR-615-3p expression in B16, Hepa 1-6 and Renca mouse cells transduced with control lentivirus or lentivirus overexpressing miR-615-3p.

d. h. and l. Relative *mTERT* mRNA expression in B16, Hepa 1-6 and Renca mouse cells transduced with control lentivirus or lentivirus overexpressing miR-615-3p.

e. i. and m. Western blotting showing overexpression of mHoxC5 in B16, Hepa 1-6 and Renca mouse cells transduced with control GFP lentivirus or lentivirus overexpressing *mHOXC5*.

f. j. and n. Relative *mTERT* mRNA expression in B16, Hepa 1-6 and Renca mouse cells transduced with control lentivirus or lentivirus overexpressing *mHOXC5*.

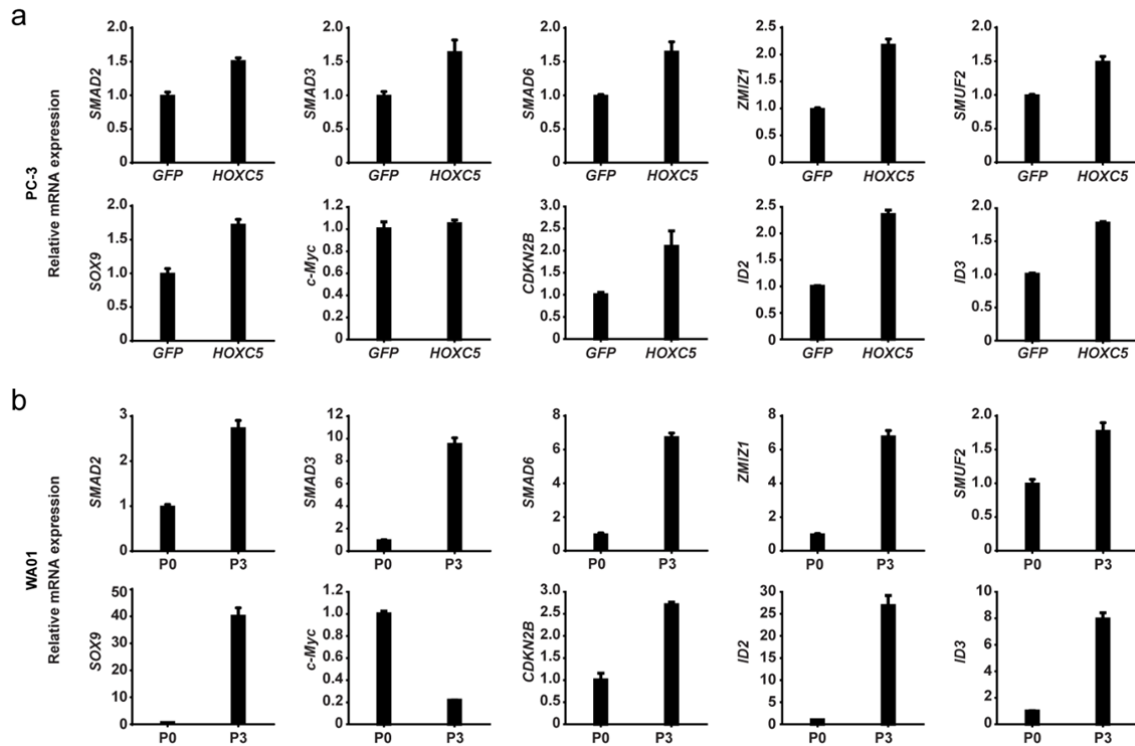

### Supplementary Figure 13: The expression of TGF- $\beta$ target genes

a. The expression of TGF- $\beta$  target genes in PC-3 cells overexpressing control *GFP* or *HOXC5* was quantified using real-time RT-PCR.

b. The expression of TGF- $\beta$  target genes in human WA01 ES cells before or after neural induction was quantified using real-time RT-PCR.

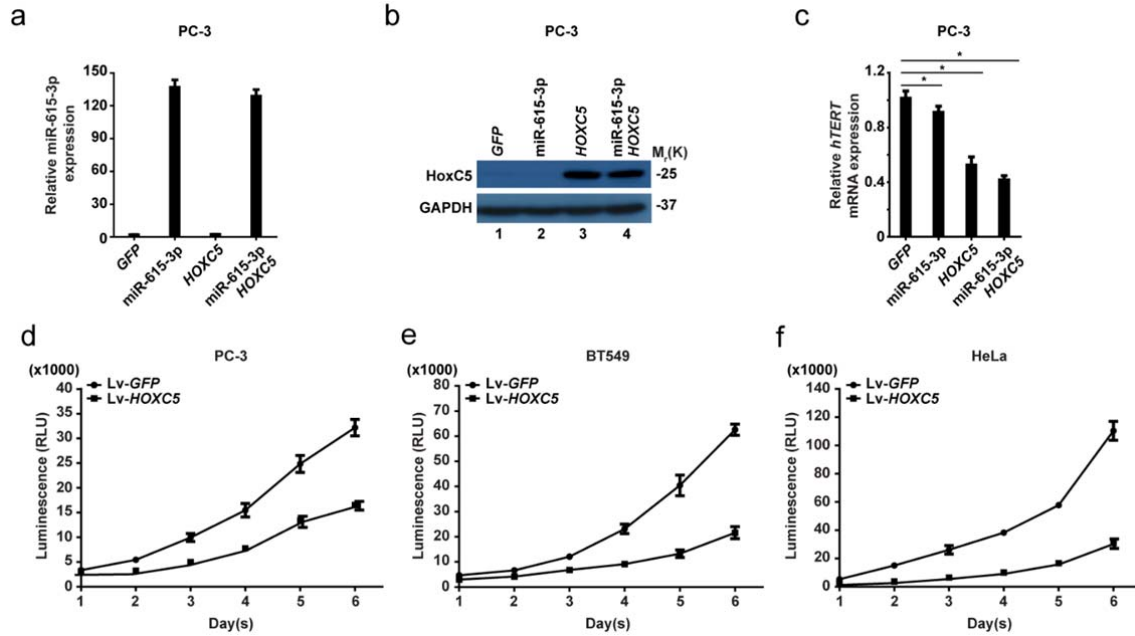

# **Supplementary Figure 14: Overexpression of *HOXC5* inhibits cancer cell proliferation.**

a. Relative expression of miR-615-3p in PC-3 cells that were transduced with lentivirus expressing *GFP*, *mir-615-3p*, *Flag-HOXC5* or both *Flag-HOXC5* and *mir-615-3p* as quantified using real-time RT-PCR.

b. The expression of Flag-tagged HoxC5 in PC-3 cells that were transduced with lentivirus expressing *GFP*, *mir-615-3p*, *Flag-HOXC5* or both *Flag-HOXC5* and *mir-615-3p* as shown by Western blotting.

c. Relative expression of *hTERT* mRNA in PC-3 cells that were transduced with lentivirus expressing *GFP*, *mir-615-3p*, *Flag-HOXC5* or both *Flag-HOXC5* and *mir-615-3p* as quantified using real-time RT-PCR. Significance was determined by t-test. \*  $P \leq 0.05$ .

d. e. and f. Overexpression of *HOXC5*, but not *GFP* inhibits PC-3, BT549 and HeLa cancer cells' proliferation as shown by CellTiter-Glo luminescent cell viability assay.

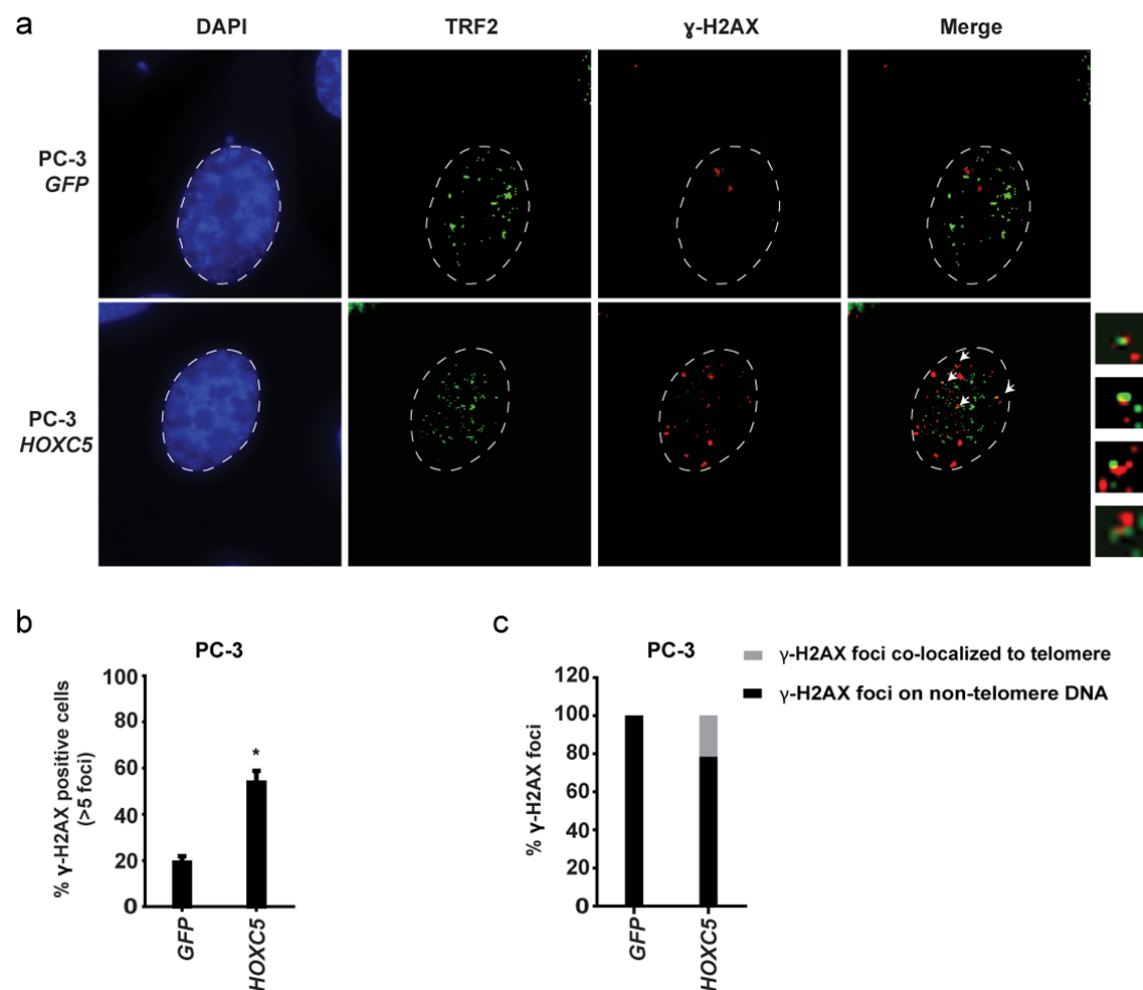

**Supplementary Figure 15: Detection of telomere dysfunction-induced foci (TIF) in PC-3 cells overexpressing *HOXC5*.**

a. Overexpression of *HOXC5*, but not *GFP* in PC-3 cells induced telomeric localization of  $\gamma$ -H2AX. Cells were processed for DNA staining (DAPI, blue) as well as double immunostaining of TRF2 (green) and  $\gamma$ -H2AX (red). Colocalization of TRF2 and  $\gamma$ -H2AX is indicated by arrow and showed in enlarged pictures.

b. Comparison of  $\gamma$ -H2AX-positive cells in PC-3 cells overexpressing *GFP* or *HOXC5*. Bars represent the mean percentage $\pm$ SD. Significance was determined by t-test. \*  $P \leq 0.05$ .

c. Quantification of  $\gamma$ -H2AX foci detected in a. Signal of  $\gamma$ -H2AX foci overlapping telomeres (gray) and those not overlapping (black) are shown separately. A minimum of 100 cells were analyzed for each cell line.

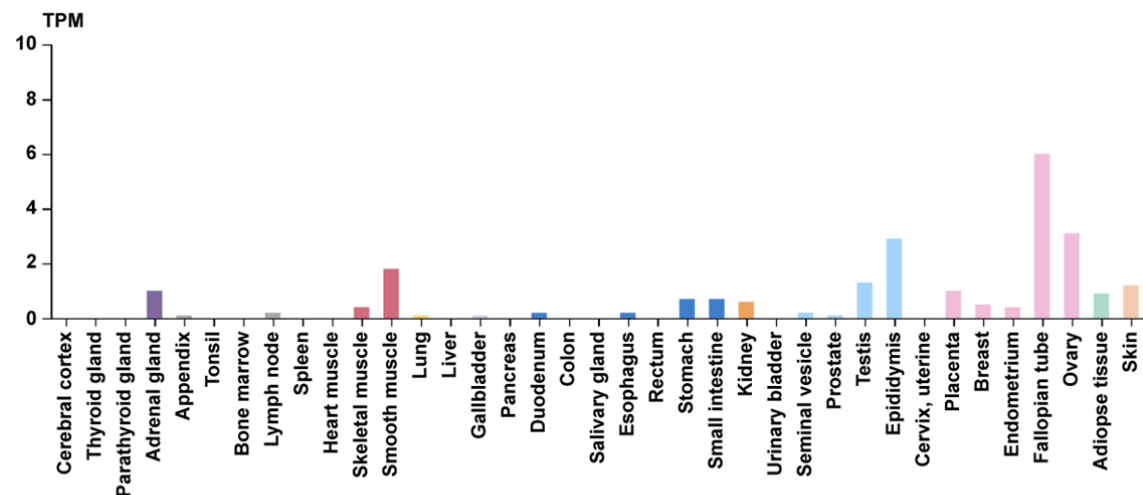

<http://www.proteinatlas.org/ENSG00000172789-HOXC5/tissue>

**Supplementary Figure 16: Expression of *HOXC5* mRNA in human tissues.**

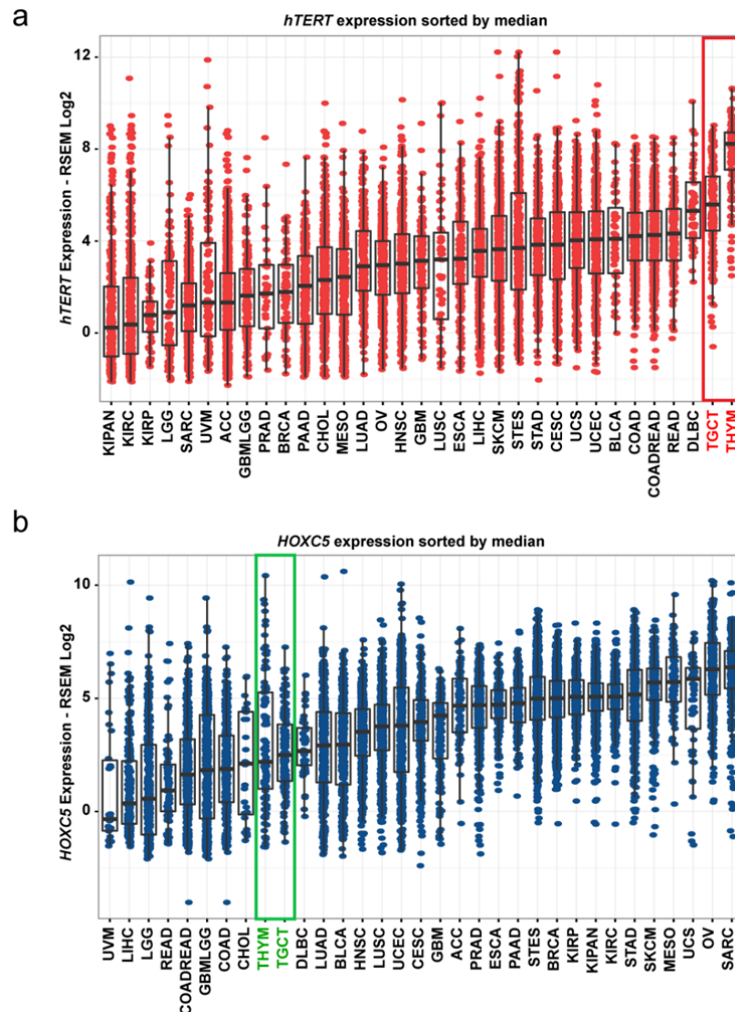

265

266 **Supplementary Figure 17: Expression of *hTERT* and *HOXC5* (Log2 RSEM) in 33**  
 267 **different TCGA cancer types.**

268 a. Boxplot of *hTERT* expression in 33 TCGA cancer types, sorted by median *hTERT*  
 269 expression. TGCT and THYM (highlighted in red box) have the highest median expression  
 270 (5.58 RSEM log2 units for TGCT and 8.23 RSEM log2 units for THYM).

271 b. Boxplot of *HOXC5* expression in 33 TCGA cancer types, sorted by median *HOXC5*  
 272 expression. TGCT and THYM (highlighted in green box) have low median expression  
 273 (2.49 for TGCT and 2.19 for THYM).

274 KIPAN: Pan-Kidney Cohort; KIRC: Kidney Renal Clear Cell Carcinoma; KIRP: Kidney Renal  
 275 Papillary Carcinoma; LGG: Brain Lower Grade Glioma; SARC: Sarcoma; UVM: Uveal  
 276 Melanoma; ACC: Adrenocortical Carcinoma; GBMLGG: Glioma; PRAD: Prostate  
 277 Adenocarcinoma; BRCA: Breast invasive carcinoma; PAAD: Pancreatic Adenocarcinoma;  
 278 CHOL: Cholangiocarcinoma; MESO: Mesothelioma; LUAD: Lung Adenocarcinoma; OV:  
 279 Ovarian Serous Cystadenocarcinoma; HNSC: Head and Neck Squamous Cell Carcinoma;  
 280 GBM: Glioblastoma Multiforme; LUSC: Lung Squamous Cell Carcinoma; ESCA: Esophageal  
 281 Carcinoma; LIHC: Liver Hepatocellular Carcinoma; SKCM: Skin Cutaneous Melanoma;  
 282 STES: Stomach and Esophageal Carcinoma; STAD: Stomach Adenocarcinoma; CESC:  
 283 Cervical and Endocervical Cancers; UCS: Uterine Carcinosarcoma; UCEC: Uterine Corpus  
 284 Endometrial Carcinoma; BLCA: Bladder Urothelial Carcinoma; COAD: Colon  
 285 Adenocarcinoma; COADREAD: Colorectal Adenocarcinoma; READ: Rectum  
 286 Adenocarcinoma; DLBC: Lymphoid Neoplasm Diffuse Large B-Cell Lymphoma; TGCT:  
 287 Testicular Germ Cell Tumor; THYM: Thymoma.

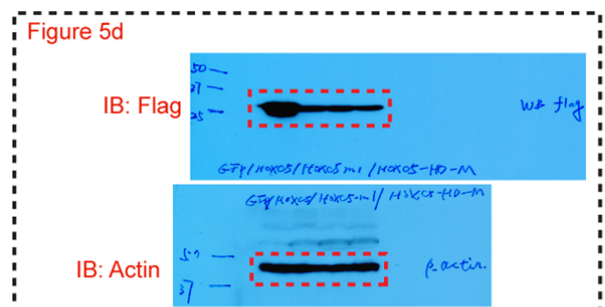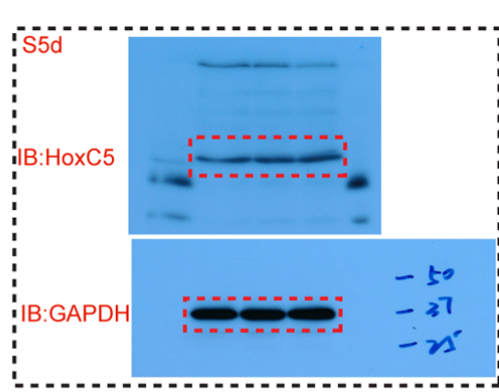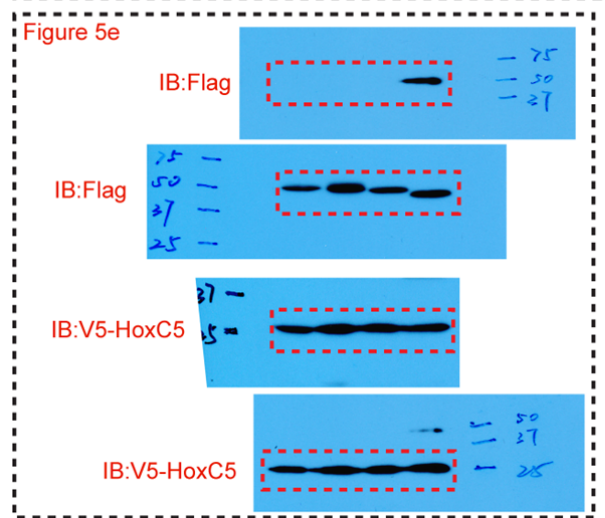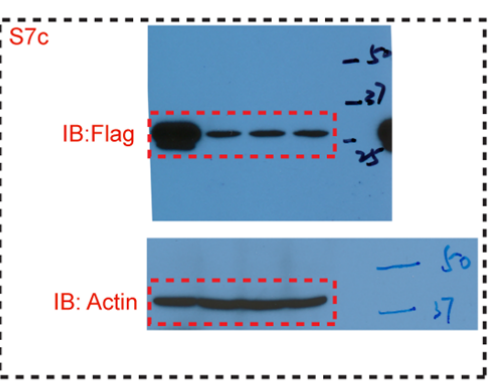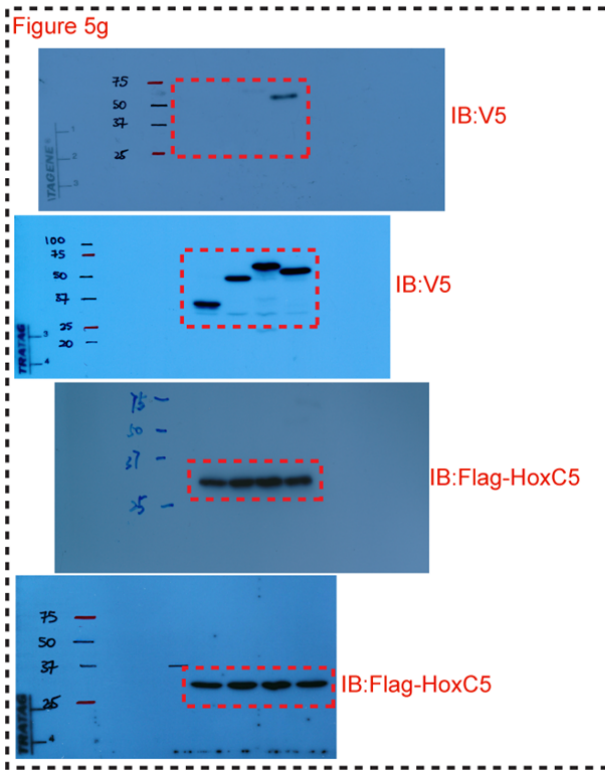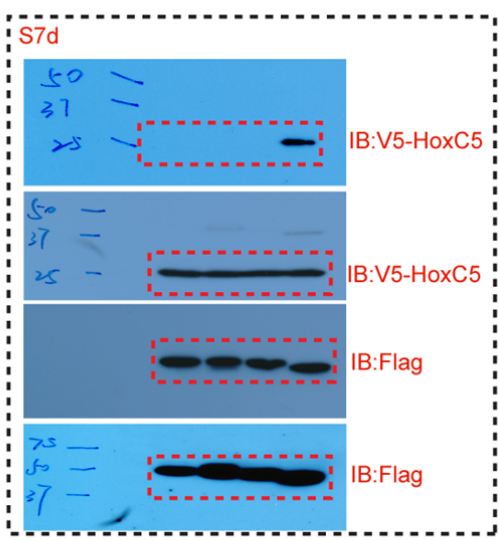

288  
289  
290  
291  
292

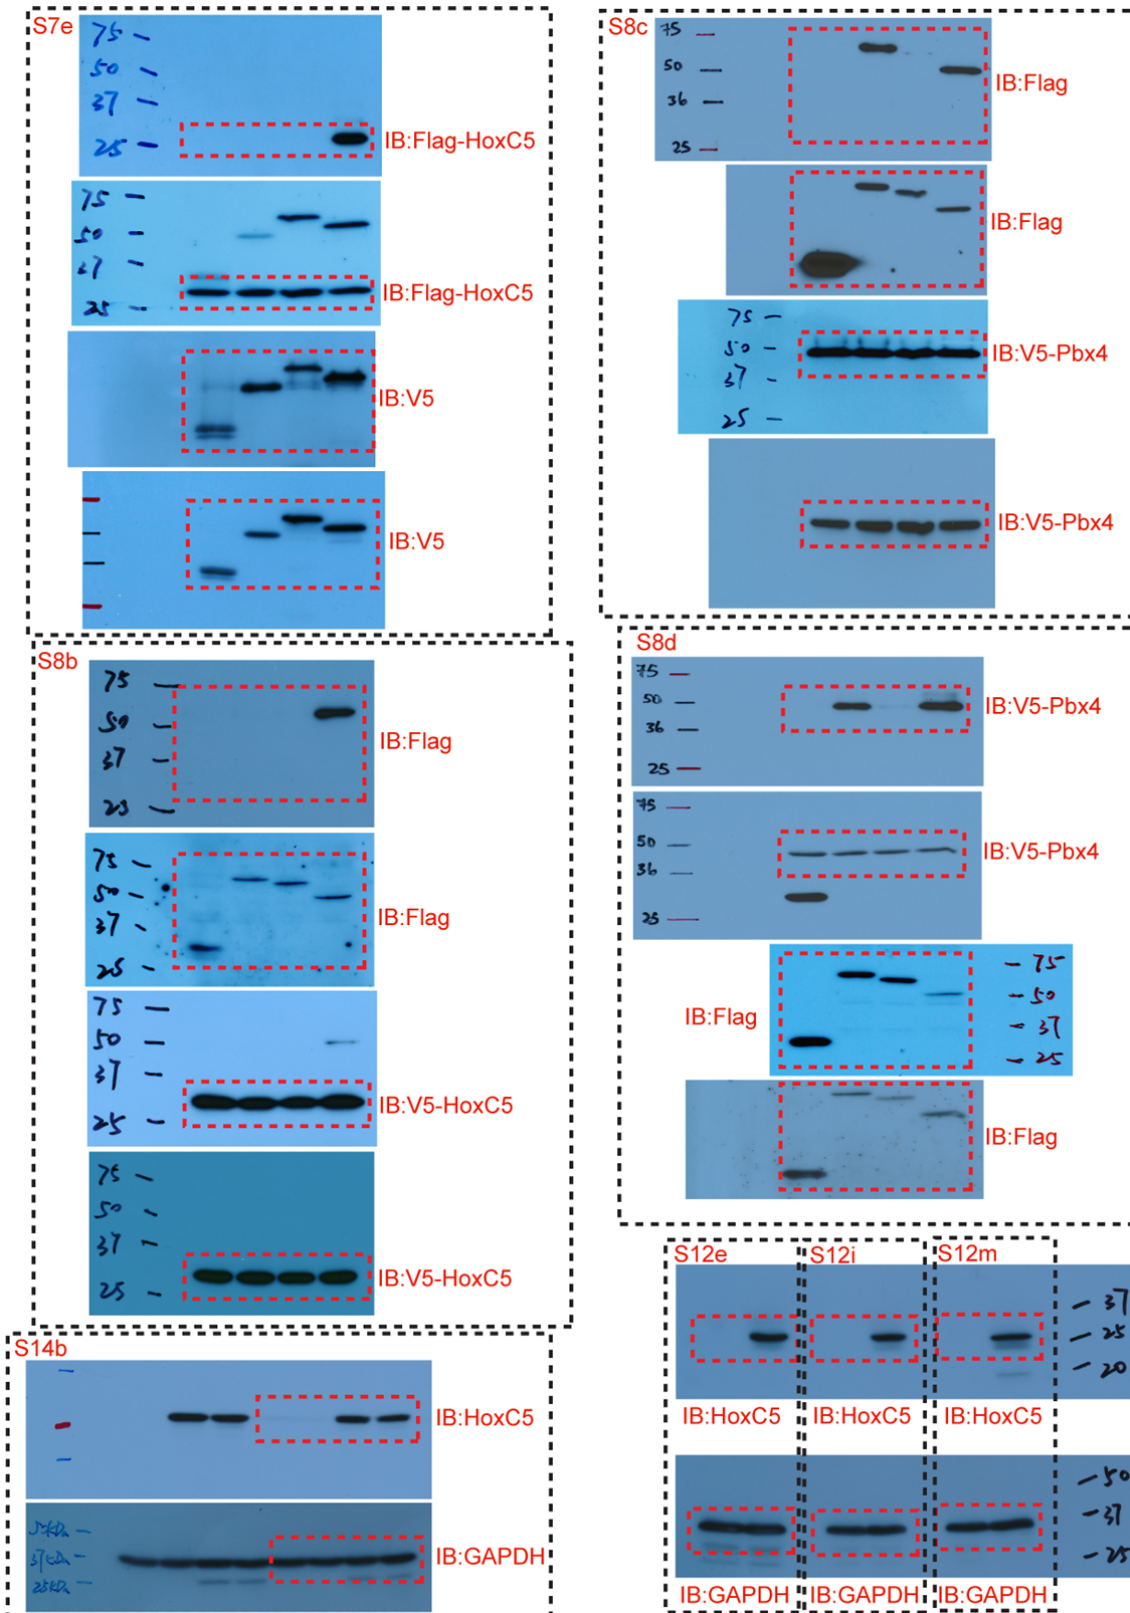

**Supplementary Figure 18: The uncropped western blot scans.**

296 **Supplementary Tables**

297

298 **Supplementary Table 1: The potential targets of miR-615-3p predicted using the**  
299 **microT-CDS algorithm.**

300

301

| Ensembl Gene Id                   | miRNA name     | miTG score  | Ensembl Gene Id  |                              |                         |
|-----------------------------------|----------------|-------------|------------------|------------------------------|-------------------------|
| ENSG00000204052 (LRRC73)          | hsa-miR-615-3p | 0.996363852 | LRRC73           | Also predicted by Targetscan |                         |
| ENSG00000149485 (FADS1)           | hsa-miR-615-3p | 0.991069849 | FADS1            | Also predicted by Targetscan |                         |
| ENSG00000120899 (PTK2B)           | hsa-miR-615-3p | 0.967646448 | PTK2B            | Also predicted by Targetscan |                         |
| ENSG00000163701 (IL17RE)          | hsa-miR-615-3p | 0.960641477 | IL17RE           | Also predicted by Targetscan |                         |
| NSG00000204422 (XXbac-BPG32J3.20) | hsa-miR-615-3p | 0.950346894 | XXbac-BPG32J3.20 | Also predicted by Targetscan |                         |
| ENSG00000141665 (FBXO15)          | hsa-miR-615-3p | 0.948559866 | FBXO15           | Also predicted by Targetscan |                         |
| ENSG00000204427 (ABHD16A)         | hsa-miR-615-3p | 0.948532097 | ABHD16A          | Also predicted by Targetscan |                         |
| ENSG00000186104 (CYP2R1)          | hsa-miR-615-3p | 0.942345735 | CYP2R1           | Also predicted by Targetscan |                         |
| ENSG00000068305 (MEF2A)           | hsa-miR-615-3p | 0.940511833 | MEF2A            | Also predicted by Targetscan |                         |
| ENSG00000099930 (OCEL1)           | hsa-miR-615-3p | 0.932861434 | OCEL1            | Also predicted by Targetscan |                         |
| ENSG00000155367 (PPM1J)           | hsa-miR-615-3p | 0.918537497 | PPM1J            | Also predicted by Targetscan |                         |
| ENSG00000168488 (ATXN2L)          | hsa-miR-615-3p | 0.905164923 | ATXN2L           | Also predicted by Targetscan |                         |
| ENSG00000103222 (NISCH)           | hsa-miR-615-3p | 0.903871908 | NISCH            | Also predicted by Targetscan |                         |
| ENSG00000162650 (ATXN7L2)         | hsa-miR-615-3p | 0.900254306 | ATXN7L2          | Also predicted by Targetscan |                         |
| ENSG00000196683 (TOMM7)           | hsa-miR-615-3p | 0.896126765 | TOMM7            | Also predicted by Targetscan |                         |
| ENSG00000114857 (NKTR)            | hsa-miR-615-3p | 0.891295434 | NKTR             | Also predicted by Targetscan |                         |
| ENSG00000264058 (KRT222)          | hsa-miR-615-3p | 0.87832565  | KRT222           | Also predicted by Targetscan |                         |
| ENSG00000125304 (TM9SF2)          | hsa-miR-615-3p | 0.870107894 | TM9SF2           | Also predicted by Targetscan |                         |
| ENSG00000130950 (NUTM2F)          | hsa-miR-615-3p | 0.868009628 | NUTM2F           | Also predicted by Targetscan |                         |
| ENSG00000136014 (USP44)           | hsa-miR-615-3p | 0.866328459 | USP44            | Also predicted by Targetscan |                         |
| ENSG00000166436 (TRIM66)          | hsa-miR-615-3p | 0.860439158 | TRIM66           | Also predicted by Targetscan |                         |
| ENSG00000177627 (C12orf54)        | hsa-miR-615-3p | 0.859569117 | C12orf54         | Also predicted by Targetscan |                         |
| ENSG00000213024 (NUP62)           | hsa-miR-615-3p | 0.853266206 | NUP62            | Also predicted by Targetscan |                         |
| ENSG00000172878 (METAP1D)         | hsa-miR-615-3p | 0.845137038 | METAP1D          | Also predicted by Targetscan |                         |
| ENSG00000090006 (LTBP4)           | hsa-miR-615-3p | 0.843511571 | LTBP4            | Also predicted by Targetscan |                         |
| ENSG00000130208 (APOC1)           | hsa-miR-615-3p | 0.836413839 | APOC1            | Also predicted by Targetscan |                         |
| ENSG00000154146 (NRGN)            | hsa-miR-615-3p | 0.835987146 | NRGN             | Also predicted by Targetscan |                         |
| ENSG00000134014 (ELP3)            | hsa-miR-615-3p | 0.8359661   | ELP3             | Also predicted by Targetscan |                         |
| ENSG00000184368 (MAP7D2)          | hsa-miR-615-3p | 0.835571226 | MAP7D2           | Also predicted by Targetscan |                         |
| ENSG00000108671 (PSMD11)          | hsa-miR-615-3p | 0.827397667 | PSMD11           | Also predicted by Targetscan |                         |
| ENSG00000072778 (ACADVL)          | hsa-miR-615-3p | 0.823677075 | ACADVL           | Also predicted by Targetscan |                         |
| ENSG00000163956 (LRPAP1)          | hsa-miR-615-3p | 0.823040269 | LRPAP1           | Also predicted by Targetscan |                         |
| ENSG00000106012 (IQCE)            | hsa-miR-615-3p | 0.81064738  | IQCE             | Also predicted by Targetscan |                         |
| ENSG00000219200 (RNASEK)          | hsa-miR-615-3p | 0.808783768 | RNASEK           | Also predicted by Targetscan | Experimentally verified |
| ENSG00000173171 (MTX1)            | hsa-miR-615-3p | 0.80098187  | MTX1             | Also predicted by Targetscan |                         |
| ENSG00000105737 (GRIK5)           | hsa-miR-615-3p | 0.798594078 | GRIK5            | Also predicted by Targetscan |                         |
| ENSG0000013503 (POLR3B)           | hsa-miR-615-3p | 0.791981561 | POLR3B           | Also predicted by Targetscan |                         |
| ENSG00000186868 (MAPT)            | hsa-miR-615-3p | 0.787900988 | MAPT             | Also predicted by Targetscan |                         |
| ENSG00000175203 (DCTN2)           | hsa-miR-615-3p | 0.786717445 | DCTN2            | Also predicted by Targetscan |                         |
| ENSG00000179057 (IGSF22)          | hsa-miR-615-3p | 0.783672468 | IGSF22           | Also predicted by Targetscan |                         |
| ENSG00000188171 (ZNF626)          | hsa-miR-615-3p | 0.782953458 | ZNF626           | Also predicted by Targetscan |                         |
| ENSG00000167858 (TEKT1)           | hsa-miR-615-3p | 0.773304055 | TEKT1            | Also predicted by Targetscan |                         |
| ENSG00000135441 (BLOC1S1)         | hsa-miR-615-3p | 0.771625171 | BLOC1S1          | Also predicted by Targetscan |                         |
| ENSG00000179133 (C10orf67)        | hsa-miR-615-3p | 0.769947324 | C10orf67         | Also predicted by Targetscan |                         |
| ENSG00000139567 (ACVRL1)          | hsa-miR-615-3p | 0.766832637 | ACVRL1           | Also predicted by Targetscan |                         |
| ENSG00000132155 (RAF1)            | hsa-miR-615-3p | 0.766538016 | RAF1             | Also predicted by Targetscan |                         |
| ENSG00000163803 (PLB1)            | hsa-miR-615-3p | 0.764041997 | PLB1             | Also predicted by Targetscan |                         |
| ENSG00000102312 (PORCN)           | hsa-miR-615-3p | 0.763990626 | PORCN            | Also predicted by Targetscan |                         |
| ENSG00000143164 (DCAF6)           | hsa-miR-615-3p | 0.757564443 | DCAF6            | Also predicted by Targetscan |                         |
| ENSG00000187486 (KCNJ11)          | hsa-miR-615-3p | 0.754144971 | KCNJ11           | Also predicted by Targetscan |                         |
| ENSG00000168487 (BMP1)            | hsa-miR-615-3p | 0.752624187 | BMP1             | Also predicted by Targetscan |                         |
| ENSG00000182504 (CEP97)           | hsa-miR-615-3p | 0.749143701 | CEP97            | Also predicted by Targetscan |                         |
| ENSG00000130055 (GDPD2)           | hsa-miR-615-3p | 0.747628184 | GDPD2            | Also predicted by Targetscan |                         |
| ENSG00000072071 (LPHN1)           | hsa-miR-615-3p | 0.734297485 | LPHN1            | Also predicted by Targetscan |                         |
| ENSG00000101577 (LPIN2)           | hsa-miR-615-3p | 0.72952031  | LPIN2            | Also predicted by Targetscan |                         |
| ENSG00000185033 (SEMA4B)          | hsa-miR-615-3p | 0.719097546 | SEMA4B           | Also predicted by Targetscan |                         |
| ENSG00000170310 (STX8)            | hsa-miR-615-3p | 0.713477468 | STX8             |                              |                         |
| ENSG00000187147 (RNF220)          | hsa-miR-615-3p | 0.704806453 | RNF220           |                              |                         |
| ENSG00000115207 (GTF3C2)          | hsa-miR-615-3p | 0.702925014 | GTF3C2           |                              |                         |

302

303

304

305

306

307

308

309

310

311

312

313

314

315

316

**Supplementary Table 2: Primer sequences for 3C experiments.**

| Name                          | Sequence               |
|-------------------------------|------------------------|
| Control interaction primer C1 | CGGTCGTAGGGTCTGATGTG   |
| Control interaction primer C2 | GTCCTCCTGTCTCCATCGTC   |
| Target interaction T1         | GTTATTAAGCCAGGCTCAGACT |
| Target interaction T2         | CCGCCCTAGTAATCTGACAC   |
| loading control RP            | AGTCCCGCACGCTCATCTT    |
| loading control FP            | ACCAAGAAGTTCATCTCCCTGG |
